# Supplementary material
Source: HighWire-hosted journal article supplement (https://www.jrheum.org/highwire/filestream/39263/field_highwire_adjunct_files/0/200367DataSuppl.pdf)
Supplement: 200367DataSuppl.pdf [file 200367DataSuppl.pdf]

## Supplementary Data 1. Definitions

### Definitions:

The systematic review included only population-based studies to obtain representative samples of the wider target populations, avoid selection bias inherent in the hospital-based studies and provide a greater generalisation of results. A population-based study was defined as a study that included the entire adult populations with clinically verified RA by physical examination by a doctor or meeting one of the RA classification criteria sets (1, 2) and resident in a defined country or geographic setting. We grouped the population-based studies based on population sampling methodology to (a) sampling population studies and (b) population database studies. Sampling population studies draw a representative sample from the target population to estimate the prevalence of RA, while population database studies used clinical and/or non-clinical health databases that cover a large proportion of extant populations for estimating the RA prevalence for the target population. Two different approaches were applied in this study to estimate RA point- and period-prevalence. RA was categorised across six criteria sets depending on the time of the study and included the ARA criteria 1956 (3), Rome criteria 1961 (4), revised ARA criteria 1987 (5), modified ARA criteria 1987 for population studies (6), and the American College of Rheumatology (ACR) and the European League Against Rheumatism (EULAR) criteria 2010 (2), and verified RA clinical diagnosis by a doctor. We grouped data sources into four categories: linked health data, administrative databases, register data, and population-based surveys (P.B.SU). Linked data were defined as the combining of one or more different data sources to capture complete ascertainment of RA diagnosis than in the stand-alone data sets such as administrative data or registry data. Administrative data defined as a resource utilisation data that designed to capture RA cases and provide billing information for insurers, while register data is defined as clinical uniform data that designed to evaluate RA prevalence for quality improvement or research (7, 8). P.B.SU data defined as a survey data that designed to temporary measure the RA prevalence in an appropriate representation of target populations based on our inclusion criteria, in order to inform the policymakers to determine the nature of the services required for the disease. We defined the geographic population settings as an urban, rural and mixed zone based on the geographic description reported in the studies. To compare RA prevalence across populations with different socioeconomic status, we also grouped studies based on Worlds Bank's income classification levels (9).

### References:

1. MacGregor AJ. Classification criteria for rheumatoid arthritis. *Baillieres Clin Rheumatol* 1995;9:287-304.
2. Aletaha D, Neogi T, Silman AJ, Funovits J, Felson DT, Bingham CO, 3rd, et al. 2010 rheumatoid arthritis classification criteria: An american college of rheumatology/european league against rheumatism collaborative initiative. *Arthritis Rheum* 2010;62:2569-81.
3. Ropes MW, Bennett GA, Cobb S, Jacox R, Jessar RA. Proposed diagnostic criteria for rheumatoid arthritis: Report of a study conducted by a committee of the american rheumatism association. *Ann Rheum Dis* 1957;16:118.
4. Kellgren JH. Diagnostic criteria for population studies. *Bull Rheum Dis* 1962;13:291.
5. Arnett FC, Edworthy SM, Bloch DA, McShane DJ, Fries JF, Cooper NS, et al. The american rheumatism association 1987 revised criteria for the classification of rheumatoid arthritis. *Arthritis Rheum* 1988;31:315-24.
6. MacGregor A, Bamber S, Silman A. A comparison of the performance of different methods of disease classification for rheumatoid arthritis. Results of an analysis from a nationwide twin study. *The Journal of rheumatology* 1994;21:1420-6.
7. Dokholyan RS, Muhlbaier LH, Falletta JM, Jacobs JP, Shahian D, Haan CK, et al. Regulatory and ethical considerations for linking clinical and administrative databases. *Am Heart J* 2009;157:971-82.
8. Dreyer NA, Garner S. Registries for robust evidence. *JAMA* 2009;302:790-1.
9. World Bank. New country classifications income level: 2019-2020. [Internet. Accessed April 04, 2020.] Available from: <https://blogs.worldbank.org/opendata/new-country-classifications-income-level-2019-2020>

**Supplementary Table 1. PRISMA 2009 checklist**

| Section/topic                      | #  | Checklist item                                                                                                                                                                                                                                                                                              | Reported on page # |
|------------------------------------|----|-------------------------------------------------------------------------------------------------------------------------------------------------------------------------------------------------------------------------------------------------------------------------------------------------------------|--------------------|
| <b>TITLE</b>                       |    |                                                                                                                                                                                                                                                                                                             |                    |
| Title                              | 1  | Identify the report as a systematic review, meta-analysis, or both.                                                                                                                                                                                                                                         | 1                  |
| <b>ABSTRACT</b>                    |    |                                                                                                                                                                                                                                                                                                             |                    |
| Structured summary                 | 2  | Provide a structured summary including, as applicable: background; objectives; data sources; study eligibility criteria, participants, and interventions; study appraisal and synthesis methods; results; limitations; conclusions and implications of key findings; systematic review registration number. | 2                  |
| <b>INTRODUCTION</b>                |    |                                                                                                                                                                                                                                                                                                             |                    |
| Rationale                          | 3  | Describe the rationale for the review in the context of what is already known.                                                                                                                                                                                                                              | 3                  |
| Objectives                         | 4  | Provide an explicit statement of questions being addressed with reference to participants, interventions, comparisons, outcomes, and study design (PICOS).                                                                                                                                                  | 3                  |
| <b>METHODS</b>                     |    |                                                                                                                                                                                                                                                                                                             |                    |
| Protocol and registration          | 5  | Indicate if a review protocol exists, if and where it can be accessed (e.g., Web address), and, if available, provide registration information including registration number.                                                                                                                               | -                  |
| Eligibility criteria               | 6  | Specify study characteristics (e.g., PICOS, length of follow-up) and report characteristics (e.g., years considered, language, publication status) used as criteria for eligibility, giving rationale.                                                                                                      | 4                  |
| Information sources                | 7  | Describe all information sources (e.g., databases with dates of coverage, contact with study authors to identify additional studies) in the search and date last searched.                                                                                                                                  | 4 & S2             |
| Search                             | 8  | Present full electronic search strategy for at least one database, including any limits used, such that it could be repeated.                                                                                                                                                                               | Table S2           |
| Study selection                    | 9  | State the process for selecting studies (i.e., screening, eligibility, included in systematic review, and, if applicable, included in the meta-analysis).                                                                                                                                                   | 4                  |
| Data collection process            | 10 | Describe method of data extraction from reports (e.g., piloted forms, independently, in duplicate) and any processes for obtaining and confirming data from investigators.                                                                                                                                  | S3, Table S3       |
| Data items                         | 11 | List and define all variables for which data were sought (e.g., PICOS, funding sources) and any assumptions and simplifications made.                                                                                                                                                                       | 5 and S1           |
| Risk of bias in individual studies | 12 | Describe methods used for assessing risk of bias of individual studies (including specification of whether this was done at the study or outcome level), and how this information is to be used in any data synthesis.                                                                                      | 4, S3, Table S3    |
| Summary measures                   | 13 | State the principal summary measures (e.g., risk ratio, difference in means).                                                                                                                                                                                                                               | 4                  |

|                      |    |                                                                                                                                                           |   |
|----------------------|----|-----------------------------------------------------------------------------------------------------------------------------------------------------------|---|
| Synthesis of results | 14 | Describe the methods of handling data and combining results of studies, if done, including measures of consistency (e.g., $I^2$ ) for each meta-analysis. | 5 |
|----------------------|----|-----------------------------------------------------------------------------------------------------------------------------------------------------------|---|

| Section/topic                 | #  | Checklist item                                                                                                                                                                                           | Reported on page # |
|-------------------------------|----|----------------------------------------------------------------------------------------------------------------------------------------------------------------------------------------------------------|--------------------|
| Risk of bias across studies   | 15 | Specify any assessment of risk of bias that may affect the cumulative evidence (e.g., publication bias, selective reporting within studies).                                                             | S3, Table S3       |
| Additional analyses           | 16 | Describe methods of additional analyses (e.g., sensitivity or subgroup analyses, meta-regression), if done, indicating which were pre-specified.                                                         | -                  |
| <b>RESULTS</b>                |    |                                                                                                                                                                                                          |                    |
| Study selection               | 17 | Give numbers of studies screened, assessed for eligibility, and included in the review, with reasons for exclusions at each stage, ideally with a flow diagram.                                          | 6                  |
| Study characteristics         | 18 | For each study, present characteristics for which data were extracted (e.g., study size, PICOS, follow-up period) and provide the citations.                                                             | 6                  |
| Risk of bias within studies   | 19 | Present data on risk of bias of each study and, if available, any outcome level assessment (see item 12).                                                                                                | S7                 |
| Results of individual studies | 20 | For all outcomes considered (benefits or harms), present, for each study: (a) simple summary data for each intervention group (b) effect estimates and confidence intervals, ideally with a forest plot. | 6–8, S3, Table S3  |
| Synthesis of results          | 21 | Present results of each meta-analysis done, including confidence intervals and measures of consistency.                                                                                                  | 8–10               |
| Risk of bias across studies   | 22 | Present results of any assessment of risk of bias across studies (see Item 15).                                                                                                                          | Table S5           |
| Additional analysis           | 23 | Give results of additional analyses, if done (e.g., sensitivity or subgroup analyses, meta-regression [see Item 16]).                                                                                    | -                  |
| <b>DISCUSSION</b>             |    |                                                                                                                                                                                                          |                    |
| Summary of evidence           | 24 | Summarize the main findings including the strength of evidence for each main outcome; consider their relevance to key groups (e.g., healthcare providers, users, and policy makers).                     | 10-14              |
| Limitations                   | 25 | Discuss limitations at study and outcome level (e.g., risk of bias), and at review-level (e.g., incomplete retrieval of identified research, reporting bias).                                            | 14                 |
| Conclusions                   | 26 | Provide a general interpretation of the results in the context of other evidence, and implications for future research.                                                                                  | 14                 |
| <b>FUNDING</b>                |    |                                                                                                                                                                                                          |                    |
| Funding                       | 27 | Describe sources of funding for the systematic review and other support (e.g., supply of data); role of funders for the systematic review.                                                               | 1                  |

From: Moher D, Liberati A, Tetzlaff J, Altman DG, The PRISMA Group (2009). Preferred Reporting Items for Systematic Reviews and Meta-Analyses: The PRISMA Statement. PLoS Med 6(7): e1000097.



## **Supplementary Data 2. Search strategy and sample search terms**

### **Search strategy**

A literature search was conducted by the first author according to Preferred Reporting Items for Systematic Reviews and Meta-Analyses (PRISMA) 2009 recommendations to locate studies in relevant databases, including ProQuest, MEDLINE (Ovid), Web of Science, and EMBASE (Ovid). The results of each search were loaded into EndNote Volume X.8 (Clarivate Analytics, PA, USA). Medical Subject Headings and the keywords were used in the search machines were peer-reviewed between first author, senior supervising author (CI) and senior librarian (SB). Different keywords were chosen, and the search was conducted using ‘AND’ and ‘OR’ in the search section of the databases (Supplemental Table 2). Reference lists from retrieved studies were used to identify more studies and were selected based on the systematic review inclusion criteria.

The search results were yielded 67 population-based studies which more and best composition than previous published systematic reviews. Selection of studies was based on our stringent eligibility criteria, and it was verified by the senior supervising author (CI). The evidence of robust search and studies selection was seen in a higher number of relevant studies, and no high-risk bias studies were included in our data.

All authors were involved in the development of the search strategy, the eligibility criteria, and data extraction sheet—the first author who run the search in multiple databases. The search strategy was tested and reiterated several times for search completeness with support of senior supervising author (CI) and senior librarian (SB) to identify extra possible search items and synonyms that can be found in relevant studies based on PRISMA 2009 recommendations.

**Supplementary Table 2. Medline search strategy.**

|           |                                                                                               |
|-----------|-----------------------------------------------------------------------------------------------|
| <b>1</b>  | Prevalence/                                                                                   |
| <b>2</b>  | Trends.mp.                                                                                    |
| <b>3</b>  | Rate.mp.                                                                                      |
| <b>4</b>  | Epidemiology/                                                                                 |
| <b>5</b>  | Arthritis, Rheumatoid/                                                                        |
| <b>6</b>  | Linked data.mp.                                                                               |
| <b>7</b>  | Survey.mp.                                                                                    |
| <b>8</b>  | Administrative data.mp.                                                                       |
| <b>9</b>  | Clinical diagnosis.mp.                                                                        |
| <b>10</b> | Registry.mp.                                                                                  |
| <b>11</b> | Population based study.mp.                                                                    |
| <b>12</b> | 1 or 2 or 3 or 4 or 11                                                                        |
| <b>13</b> | 6 or 7 or 8 or 9 or 10 or 11                                                                  |
| <b>14</b> | 5 and 12 and 13                                                                               |
| <b>15</b> | limit 14 to (English language and Full Text and humans and yr="1980 - 2019" and "all adult ") |

## **Supplementary Data 3. Risk of bias assessment method and data extraction**

### **Risk of bias assessment:**

The research articles selected for this review were evaluated by one independent reviewer (KM) and verified by the senior supervising author (CI) for methodological validity before inclusion in the review using the Hoy et al. tool for risk of bias of prevalence studies (1) (Supplemental Table 3). The advantage of this tool it makes a distinction between assessing whether the research was conducted to the highest possible standards for methodological quality and to which extent the results have risk bias. The Hoy et al. risk bias tool consists of ten questions where “Yes” answer implications a low risk of bias and “No” answer a high risk of bias. These ten questions include:

External validity:

1. Was the target population a close representation of the general population?
2. Was the sampling frame a close representation of the target population?
3. Was some form of random selection used to select the sample?
4. Was the likelihood of non-response bias minimal?

Internal validity:

5. Was data collected directly from the subjects?
6. Was an acceptable case definition used?
7. Was the study instrument that measured the parameter of interest shown to have reliability and validity?
8. Was the same mode of data collection used all subjects?
9. Were the numerator and denominator for the parameter of interest appropriate?
10. Was the length of the shortest prevalence period for the parameter of interest appropriate?

When interpreting studies on the prevalence of RA, these important questions were considered in the present review. The published studies were reviewed and evaluated, and studies that met inclusion criteria were incorporated in the systematic review.

### **Data extraction**

The study information (such as authors, year, country where the study was conducted) was initially recorded. All the information related to participants, such as the source population size and sample size who participated in the study, was extracted. The methodology section, the method used to measure RA prevalence, such as point- or period-prevalence, was outlined. The data sources such as administrative databases, linked data, medical records, register data and P.B.SU were also extracted.

## Supplementary Table 3. Risk bias assessment checklist for Prevalence studies (1).

| Name of author(s):                                                                                                                                            |                                                                                                                                                                                                                                    |               |
|---------------------------------------------------------------------------------------------------------------------------------------------------------------|------------------------------------------------------------------------------------------------------------------------------------------------------------------------------------------------------------------------------------|---------------|
| Publication title:                                                                                                                                            |                                                                                                                                                                                                                                    |               |
| Year of publication:                                                                                                                                          |                                                                                                                                                                                                                                    |               |
| Risk of bias items                                                                                                                                            | Risk of bias levels                                                                                                                                                                                                                | Points scored |
| 1. Was the study's target population a close representation of the national population in relation to relevant variables, e.g. age, sex, occupation?          | Yes (LOW RISK): The study's target population was a close representation of the national population.                                                                                                                               | 0             |
|                                                                                                                                                               | No (HIGH RISK): The study's target population was clearly NO representative of the national population.                                                                                                                            | 1             |
| 2. Was the sampling frame a true or close representation of the target population?                                                                            | Yes (LOW RISK): The study's target population was a close representation of the national population.                                                                                                                               | 0             |
|                                                                                                                                                               | No (HIGH RISK): The study's target population was clearly NOT representative of the national population.                                                                                                                           | 1             |
| 3. Was some form of random selection used to select the sample. OR, was a census undertaken?                                                                  | Yes (LOW RISK): A census was undertaken, OR, some form of random selection was used to select the sample (e.g. simple random sampling, stratified random sampling, cluster sampling, systematic sampling).                         | 0             |
|                                                                                                                                                               | No (HIGH RISK): The study's target population was clearly NOT representative of the national population.                                                                                                                           | 1             |
| 4. Was the likelihood of non-response bias minimal?                                                                                                           | Yes (LOW RISK): The response rate for the study was >75%, OR, An analysis was performed that showed no significant difference in relevant demographic characteristics between responders and non- responders                       | 0             |
|                                                                                                                                                               | No (HIGH RISK): The response rate was <75%, and if any analysis comparing responders and non-responders was done, it showed a significant difference in relevant demographic characteristics between responders and non-responders | 1             |
| 5. Were data collected directly from the subjects (as opposed to a proxy)?                                                                                    | Yes (LOW RISK): All data were collected directly from the subjects.                                                                                                                                                                | 0             |
|                                                                                                                                                               | No (HIGH RISK): In some instances, data were collected from a proxy.                                                                                                                                                               | 1             |
| 6. Was an acceptable case definition used in the study?                                                                                                       | Yes (LOW RISK): An acceptable case definition was used.                                                                                                                                                                            | 0             |
|                                                                                                                                                               | No (HIGH RISK): An acceptable case definition was NOT used.                                                                                                                                                                        | 1             |
| 7. Was the study instrument that measured the parameter of interest (e.g. prevalence of low back pain) shown to have reliability and validity (if necessary)? | Yes (LOW RISK): The study instrument had been shown to have reliability and validity (if this was necessary), e.g. test-re- test, piloting, validation in a previous study, etc.                                                   | 0             |
|                                                                                                                                                               | No (HIGH RISK): The study instrument had NOT been shown to have reliability or validity (if this was necessary).                                                                                                                   | 1             |
| 8. Was the same mode of data collection used for all subjects?                                                                                                | Yes (LOW RISK): The same mode of data collection was used for all subjects.                                                                                                                                                        | 0             |
|                                                                                                                                                               | No (HIGH RISK): The same mode of data collection was NOT used for all subjects.                                                                                                                                                    | 1             |
| 9. Were the numerators) and denominator r(s) for the parameter of interest appropriate                                                                        | Yes (LOW RISK): The paper presented appropriate numerator(s) AND denominator(s) for the parameter of interest (e.g. the prevalence of low back pain).                                                                              | 0             |
|                                                                                                                                                               | No (HIGH RISK): The paper did present numerators) AND denominator(s) for the parameter of interest but one or more of these were inappropriate.                                                                                    | 1             |
| 10. Was the length of the shortest prevalence period for the parameter of interest appropriate?                                                               | Yes (LOW RISK): The length of the shortest prevalence period for the parameter of interest was appropriate (e.g. point prevalence).                                                                                                | 0             |
|                                                                                                                                                               | No (HIGH RISK): The length of the shortest prevalence period for the parameter of interest was not appropriate (e.g. life-time prevalence).                                                                                        | 1             |
| Summary on the overall risk of study bias point score:                                                                                                        |                                                                                                                                                                                                                                    |               |
| LOW RISK      0-3                                                                                                                                             |                                                                                                                                                                                                                                    |               |
| MODERATE RISK 4-6                                                                                                                                             |                                                                                                                                                                                                                                    |               |
| HIGH RISK     7-10                                                                                                                                            |                                                                                                                                                                                                                                    |               |

### Reference:

1. Hoy D, Brooks P, Woolf A, Blyth F, March L, Bain C, et al. Assessing risk of bias in prevalence studies: Modification of an existing tool and evidence of interrater agreement. J Clin Epidemiol 2012;65:934-9.



## **Supplementary Data 4. Excluded studies and reasons for exclusion**

### **Excluded studies:**

Studies were excluded primarily from the review for the following reasons: (a) out the scope of the prevalence of RA (n=38); (b) not a representative sample of the general population (n=28); (c) narrative review (n=12).

### **Excluded studies and reasons for exclusion.**

Aho K, Kaipiainen-Seppanen O, Heliovaara M, Klaukka T. Epidemiology of rheumatoid arthritis in Finland. *Seminars in arthritis and rheumatism*. 1998;27(5):325–34.

#### **Reason for exclusion: review**

Akhter E, Bilal S, Kiani A, Haque U. Prevalence of arthritis in India and Pakistan: a review. *Rheumatol Int*. 2011;31(7):849–55.

#### **Reason for exclusion: review**

Al-Herz A, Al-Awadhi A, Saleh K, Al-Kandari W, Hasan E, Ghanem A, et al. Low Prevalence of Nodules in Rheumatoid Arthritis Patients in Kuwait: A Description and a Comparison of Patients from the Kuwait Registry for Rheumatic Diseases. *Med Princ Pract*. 2017;26(2):152–6.

#### **Reason for exclusion: out of scope**

Alamanos Y, Drosos AA. Epidemiology of adult rheumatoid arthritis. *Autoimmunity reviews*. 2005;4(3):130–6.

#### **Reason for exclusion: review**

Alamanos Y, Voulgari PV, Drosos AA. Incidence and prevalence of rheumatoid arthritis, based on the 1987 American College of Rheumatology criteria: a systematic review. *Seminars in arthritis and rheumatism*. 2006;36(3):182–8.

#### **Reason for exclusion: systematic review**

Albrecht K, Luque Ramos A, Hoffmann F, Redeker I, Zink A. High prevalence of diabetes in patients with rheumatoid arthritis: results from a questionnaire survey linked to claims data. *Rheumatology (Oxford)*. 2018;57(2):329–36.

#### **Reason for exclusion: out of scope**

Anaya JM, Correa PA, Mantilla RD, Jimenez F, Kuffner T, McNicholl JM. Rheumatoid arthritis in African Colombians from Quibdo. *Seminars in arthritis and rheumatism*. 2001;31(3):191–8.

#### **Reason for exclusion: sub-population**

Barrera P, Radstake TR, Albers JM, van Riel PL, van de Putte LB. Familial aggregation of rheumatoid arthritis in The Netherlands: a cross-sectional hospital-based survey. *European Consortium on Rheumatoid Arthritis families (ECRAF)*. *Rheumatology (Oxford)*. 1999;38(5):415–22.

#### **Reason for exclusion: sub-population**

Bellamy N, Duffy D, Martin N, Mathews J. Rheumatoid arthritis in twins: a study of aetiopathogenesis based on the Australian Twin Registry. *Ann Rheum Dis*. 1992;51(5):588–93.

#### **Reason for exclusion: sub-population**

Bongartz T, Nannini C, Medina-Velasquez YF, Achenbach SJ, Crowson CS, Ryu JH, et al. Incidence and

mortality of interstitial lung disease in rheumatoid arthritis: a population-based study. *Arthritis and rheumatism*. 2010;62(6):1583–91.

**Reason for exclusion: out of scope**

Boyer GS, Benevolenskaya LI, Templin DW, Erdesz S, Bowler A, Alexeeva LI, et al. Prevalence of rheumatoid arthritis in circumpolar native populations. *The Journal of rheumatology*. 1998;25(1):23–9.

**Reason for exclusion: sub-population**

Brunier L, Bleterry M, Merle S, Derancourt C, Polomat K, Dehlinger V, et al. Prevalence of rheumatoid arthritis in the French West Indies: Results of the EPPRA study in Martinique. *Joint Bone Spine*. 2017;84(4):455–61.

**Reason for exclusion: sub-population**

Buchbinder R, March L, Lassere M, Briggs AM, Portek I, Reid C, et al. Effect of treatment with biological agents for arthritis in Australia: the Australian Rheumatology Association Database. *Internal medicine journal*. 2007;37(9):591–600.

**Reason for exclusion: out of scope**

Carmona L, Ballina J, Gabriel R, Laffon A, Episer Study Group. The burden of musculoskeletal diseases in the general population of Spain: results from a national survey. *Ann Rheum Dis*. 2001;60(11):1040–5.

**Reason for exclusion: Duplicate**

Chauhan K, Ackerman MJ, Crowson CS, Matteson EL, Gabriel SE. Population-based study of QT interval prolongation in patients with rheumatoid arthritis. *Clinical and experimental rheumatology*. 2015;33(1):84–9.

**Reason for exclusion: out of scope**

Chen HH, Huang N, Chen YM, Chen TJ, Chou P, Lee YL, et al. Association between a history of periodontitis and the risk of rheumatoid arthritis: a nationwide, population-based, case-control study. *Ann Rheum Dis*. 2013;72(7):1206–11.

**Reason for exclusion: out of scope**

Cobo-Ibanez T, Descalzo MA, Loza-Santamaria E, Carmona L, Munoz-Fernandez S. Serious infections in patients with rheumatoid arthritis and other immune-mediated connective tissue diseases exposed to anti-TNF or rituximab: data from the Spanish registry BIOBADASER 2.0. *Rheumatol Int*. 2014;34(7):953–61.

**Reason for exclusion: out of scope**

Covic T, Cumming SR, Pallant JF, Manolios N, Emery P, Conaghan PG, et al. Depression and anxiety in patients with rheumatoid arthritis: prevalence rates based on a comparison of the Depression, Anxiety and Stress Scale (DASS) and the hospital, Anxiety and Depression Scale (HADS). *BMC Psychiatry*. 2012;12:6.

**Reason for exclusion: out of scope**

Del Puente A, Knowler WC, Pettitt DJ, Bennett PH. High incidence and prevalence of rheumatoid arthritis in Pima Indians. *Am J Epidemiol*. 1989;129(6):1170–8.

**Reason for exclusion: sub-population**

Doran MF, Crowson CS, O'Fallon WM, Gabriel SE. The effect of oral contraceptives and estrogen replacement therapy on the risk of rheumatoid arthritis: a population based study. *The Journal of rheumatology*. 2004;31(2):207–13.

**Reason for exclusion: sub-population**

Erdes S, Alekseeva LI, Krylov Mi, Kariakin AN, Benevolenskaia LI. [The prevalence of rheumatoid arthritis and the rheumatoid factor in the native inhabitants of northeastern Siberia]. *Ter Arkh*. 1999;71(5):9–12.

**Reason for exclusion: Article in Russian**

Feldman DE, Bernatsky S, Haggerty J, Leffondre K, Tousignant P, Roy Y, et al. Delay in consultation with specialists for persons with suspected new-onset rheumatoid arthritis: a population-based study. *Arthritis and rheumatism*. 2007;57(8):1419–25.

**Reason for exclusion: out of scope**

Finckh A, Simard JF, Duryea J, Liang MH, Huang J, Daneel S, et al. The effectiveness of anti-tumor necrosis factor therapy in preventing progressive radiographic joint damage in rheumatoid arthritis: a population-based study. *Arthritis and rheumatism*. 2006;54(1):54–9.

**Reason for exclusion: out of scope**

Firth J, Hale C, Helliwell P, Hill J, Nelson EA. The prevalence of foot ulceration in patients with rheumatoid arthritis. *Arthritis and rheumatism*. 2008;59(2):200–5.

**Reason for exclusion: out of scope**

Galushko EA, Erdes Sh F, Bazorkina DI, Bol'shakova Ti, Vinogradova IB, Lesniak OM, et al. [Prevalence of rheumatoid arthritis in Russia (according to epidemiological findings)]. *Ter Arkh*. 2010;82(5):9–14.

**Reason for exclusion: Article in Russian**

Gist AC, Guymer EK, Eades LE, Leech M, Littlejohn GO. Fibromyalgia remains a significant burden in rheumatoid arthritis patients in Australia. *Int J Rheum Dis*. 2018;21(3):639–46.

**Reason for exclusion: out of scope**

Hagen KB, Kvien TK, Bjorndal A. Musculoskeletal pain and quality of life in patients with noninflammatory joint pain compared to rheumatoid arthritis: a population survey. *The Journal of rheumatology*. 1997;24(9):1703–9.

**Reason for exclusion: out of scope**

Hah JH, An SY, Sim S, Kim SY, Oh DJ, Park B, et al. A population-based study on the association between rheumatoid arthritis and voice problems. *Clinical rheumatology*. 2016;35(7):1873–8.

**Reason for exclusion: Sub population**

Hameed K, Gibson T. A comparison of the prevalence of rheumatoid arthritis and other rheumatic diseases amongst Pakistanis living in England and Pakistan. *Br J Rheumatol*. 1997;36(7):781–5.

**Reason for exclusion: sub-population**

Helmick CG, Felson DT, Lawrence RC, Gabriel S, Hirsch R, Kwoh CK, et al. Estimates of the prevalence of arthritis and other rheumatic conditions in the United States. Part I. *Arthritis and rheumatism*. 2008;58(1):15–25.

**Reason for exclusion: review**

Hochberg MC, Johnston SS, John AK. The incidence and prevalence of extra-articular and systemic manifestations in a cohort of newly-diagnosed patients with rheumatoid arthritis between 1999 and 2006. *Current Medical Research and Opinion*. 2008;24(2):469–80.

**Reason for exclusion: out of scope**

Hooyman JR, Melton LJ, Nelson AM, O'Fallon WM, Riggs BL. Fractures after rheumatoid arthritis. A population-based study. *Arthritis and rheumatism*. 1984;27(12):1353–61.

**Reason for exclusion: Using secondary data**

Hoy D, Brooks P, Woolf A, Blyth F, March L, Bain C, et al. Assessing risk of bias in prevalence studies: modification of an existing tool and evidence of interrater agreement. *J Clin Epidemiol*. 2012;65(9):934–9.

**Reason for exclusion: out of scope**

Hsu CC, Chen SC, Liu CJ, Lu T, Shen CC, Hu YW, et al. Rheumatoid arthritis and the risk of bipolar disorder: a nationwide population-based study. *Public Library of Science one*. 2014;9(9):e107512.

**Reason for exclusion: out of scope**

Hsu FC, Starkebaum G, Boyko EJ, Dominitz JA. Prevalence of rheumatoid arthritis and hepatitis C in those age 60 and elderlyer in a US population based study. *Journal of Rheumatology*. 2003;30(3):455–8.

**Reason for exclusion: sub-population**

Huang MC, Pai FT, Lin CC, Chang CM, Chang HH, Lee YC, et al. Characteristics of traditional Chinese medicine use in patients with rheumatoid arthritis in Taiwan: A nationwide population-based study. *J Ethnopharmacol*. 2015;176:9–16.

**Reason for exclusion: out of scope**

Hur N-W, Choi C-B, Uhm W-S, Bae S-C. The prevalence and trend of arthritis in Korea: results from Korea National Health and Nutrition Examination Surveys. *The journal of the Korean rheumatism association*. 2008;15(1):11–26.

**Reason for exclusion: Article in Korean**

Jacobsson L, Lindgärde F, Manthorpe R. The Commonest Rheumatic Complaints of Over Six Weeks' Duration in a Twelve-month Period in a Defined Swedish Population Prevalences and Relationships. *Scandinavian journal of rheumatology*. 1989;18(6):353–60.

**Reason for exclusion: out of scope**

Jacobsson LT, Knowler WC, Pillemer S, Hanson RL, Pettitt DJ, Nelson RG, et al. Rheumatoid arthritis and mortality. A longitudinal study in Pima Indians. *Arthritis and rheumatism*. 1993;36(8):1045–53.

**Reason for exclusion: sub-population**

Jeong H, Baek SY, Kim SW, Eun YH, Kim IY, Kim H, et al. Comorbidities of rheumatoid arthritis: Results from the Korean National Health and Nutrition Examination Survey. *Public Library of Science one*. 2017;12(4):e0176260.

**Reason for exclusion: out of scope**

Jeong HS, Hong SJ, Choi SJ, Kim JH, Song GG, Jung JH. Effects of oral contraceptives on rheumatoid arthritis in Korean menopausal women: A nationwide cross-sectional study. *Maturitas*. 2018;112:24–8.

**Reason for exclusion: Sub population**

Jin S, Li M, Fang Y, Li Q, Liu J, Duan X, et al. Chinese Registry of rheumatoid arthritis (CREDIT): II. prevalence and risk factors of major comorbidities in Chinese patients with rheumatoid arthritis. *Arthritis research & therapy*. 2017;19(1):251.

**Reason for exclusion: out of scope**

Karsh J, Chen Y, Lin M, Dales R. The association between allergy and rheumatoid arthritis in the Canadian population. *Eur J Epidemiol*. 2005;20(9):783–7.

**Reason for exclusion: Using secondary data**

Kato E, Sawada T, Tahara K, Hayashi H, Tago M, Mori H, et al. The age at onset of rheumatoid arthritis is increasing in Japan: a nationwide database study. *Int J Rheum Dis*. 2017;20(7):839–45.

**Reason for exclusion: out of scope**

Kauppi M, Hartikainen S, Kautiainen H, Laiho K, Sulkava R. Capability for daily activities in old people with rheumatoid arthritis: a population based study. *Ann Rheum Dis*. 2005;64(1):56–8.

**Reason for exclusion: sub-population**

Kaushik P, Solomon DH, Greenberg JD, Anderson JT, Reed G, Pala O, et al. Subcutaneous nodules are associated with cardiovascular events in patients with rheumatoid arthritis: results from a large US registry. *Clinical rheumatology*. 2015;34(10):1697–704.

**Reason for exclusion: out of scope**

Kvien TK, Uhlig T. The population based studies in rheumatoid arthritis. A method of longterm followup studies. *J Rheumatol Suppl.* 2004;69:35–40.

**Reason for exclusion: review**

Lacaille D, Guh DP, Abrahamowicz M, Anis AH, Esdaile JM. Use of nonbiologic disease-modifying antirheumatic drugs and risk of infection in patients with rheumatoid arthritis. *Arthritis and rheumatism.* 2008;59(8):1074–81.

**Reason for exclusion: Using secondary data**

Laiho K, Tuomilehto J, Tilvis R. Prevalence of rheumatoid arthritis and musculoskeletal diseases in the elderly population. *Rheumatol Int.* 2001;20(3):85–7.

**Reason for exclusion: sub-population (elderly patients)**

Lau E, Symmons D, Bankhead C, MacGregor A, Donnan S, Silman A. Low prevalence of rheumatoid arthritis in the urbanized Chinese of Hong Kong. *The Journal of rheumatology.* 1993;20(7):1133–7.

**Reason for exclusion: Abstract**

Lawrence RC, Helmick CG, Arnett FC, Deyo RA, Felson DT, Giannini EH, et al. Estimates of the prevalence of arthritis and selected musculoskeletal disorders in the United States. *Arthritis & Rheumatism: Official Journal of the American College of Rheumatology.* 1998;41(5):778–99.

**Reason for exclusion: review**

Liao CY, Chan HT, Chao E, Yang CM, Lu TC. Comparison of total hip and knee joint replacement in patients with rheumatoid arthritis and osteoarthritis: a nationwide, population-based study. *Singapore Med J.* 2015;56(1):58–64.

**Reason for exclusion: out of scope**

Lin HC, Chen SF, Lin HC, Chen YH. Increased risk of adverse pregnancy outcomes in women with rheumatoid arthritis: a nationwide population-based study. *Ann Rheum Dis.* 2010;69(4):715–7.

**Reason for exclusion: out of scope**

Linos A, Worthington JW, O'Fallon WM, Kurland LT. The epidemiology of rheumatoid arthritis in Rochester, Minnesota: a study of incidence, prevalence, and mortality. *Am J Epidemiol.* 1980;111(1):87–98.

**Reason for exclusion: Duplicate**

MacGregor AJ, Riste LK, Hazes JM, Silman AJ. Low prevalence of rheumatoid arthritis in black-Caribbeans compared with whites in inner city Manchester. *Ann Rheum Dis.* 1994;53(5):293–7.

**Reason for exclusion: sub-population**

Maradit-Kremers H, Nicola PJ, Crowson CS, Ballman KV, Gabriel SE. Cardiovascular death in rheumatoid arthritis: a population-based study. *Arthritis and rheumatism.* 2005;52(3):722–32.

**Reason for exclusion: sub-population**

McDougall C, Hurd K, Barnabe C. Systematic review of rheumatic disease epidemiology in the indigenous populations of Canada, the United States, Australia, and New Zealand. *Seminars in arthritis and rheumatism.* 2017;46(5):675–86.

**Reason for exclusion: sub-population**

Michet CJ, Strobova K, Achenbach S, Crowson CS, Matteson EL. Hospitalization rates and utilization among patients with rheumatoid arthritis: a population-based study from 1987 to 2012 in Olmsted County, Minnesota. *Mayo Clin Proc.* 2015;90(2):176–83.

**Reason for exclusion: out of scope**

Minaur N, Sawyers S, Parker J, Darmawan J. Rheumatic disease in an Australian Aboriginal community in North Queensland, Australia. A WHO-ILAR COPCORD survey. *The Journal of rheumatology.*

2004;31(5):965–72.

**Reason for exclusion: sub-population**

Minichiello E, Semerano L, Boissier MC. Time trends in the incidence, prevalence, and severity of rheumatoid arthritis: A systematic literature review. *Joint Bone Spine*. 2016;83(6):625–30.

**Reason for exclusion: systematic review**

Myasoedova E, Gabriel SE, Green AB, Matteson EL, Crowson CS. Impact of statin use on lipid levels in statin-naïve patients with rheumatoid arthritis versus non-rheumatoid arthritis subjects: results from a population-based study. *Arthritis care & research*. 2013;65(10):1592–9.

**Reason for exclusion: out of scope**

Myasoedova E, Talley NJ, Manek NJ, Crowson CS. Prevalence and risk factors of gastrointestinal disorders in patients with rheumatoid arthritis: results from a population-based survey in Olmsted County, Minnesota. *Gastroenterol Res Pract*. 2011;2011:745829.

**Reason for exclusion: out of scope**

Nicola PJ, Maradit-Kremers H, Roger VL, Jacobsen SJ, Crowson CS, Ballman KV, et al. The risk of congestive heart failure in rheumatoid arthritis: a population-based study over 46 years. *Arthritis and rheumatism*. 2005;52(2):412–20.

**Reason for exclusion: Using secondary data**

Nikiphorou E, Carpenter L, Morris S, Macgregor AJ, Dixey J, Kiely P, et al. Hand and foot surgery rates in rheumatoid arthritis have declined from 1986 to 2011, but large-joint replacement rates remain unchanged: results from two UK inception cohorts. *Arthritis Rheumatol*. 2014;66(5):1081–9.

**Reason for exclusion: out of scope**

Nishino J, Tanaka S, Matsui T, Mori T, Nishimura K, Eto Y, et al. Prevalence of joint replacement surgery in rheumatoid arthritis patients: cross-sectional analysis in a large observational cohort in Japan. *Mod Rheumatol*. 2009;19(3):260–4.

**Reason for exclusion: out of scope**

Norgaard M, Larsson H, Pedersen L, Granath F, Askling J, Kieler H, et al. Rheumatoid arthritis and birth outcomes: a Danish and Swedish nationwide prevalence study. *J Intern Med*. 2010;268(4):329–37.

**Reason for exclusion: out of scope**

Ollivier Y, Saraux A, Le Goff P. Prevalences of rheumatoid arthritis in Roman Catholic nuns and the general female population in Brittany, France: a pilot study. *Clinical and experimental rheumatology*. 2004;22(6):759–62.

**Reason for exclusion: sub-population**

Peschken CA, Hitchon CA, Garland A, Bernstein CN, Chen H, Fransoo R, et al. A Population-based Study of Intensive Care Unit Admissions in Rheumatoid Arthritis. *The Journal of rheumatology*. 2016;43(1):26–33.

**Reason for exclusion: sub-population**

Rai SK, Avina-Zubieta JA, McCormick N, De Vera MA, Lacaille D, Sayre EC, et al. Trends in Gout and Rheumatoid Arthritis Hospitalizations in Canada From 2000 to 2011. *Arthritis care & research*. 2017;69(5):758–62.

**Reason for exclusion: out of scope**

Rasch EK, Hirsch R, Paulose-Ram R, Hochberg MC. Prevalence of rheumatoid arthritis in persons 60 years of age and older in the United States: effect of different methods of case classification. *Arthritis and rheumatism*. 2003;48(4):917–26.

**Reason for exclusion: sub-population**

Rathbun AM, Harrold LR, Reed GW. A description of patient- and rheumatologist-reported depression symptoms in an American rheumatoid arthritis registry population. *Clinical and experimental rheumatology*. 2014;32(4):523–32.

**Reason for exclusion: secondary data analysis**

Rathbun AM, Harrold LR, Reed GW. Temporal effect of depressive symptoms on the longitudinal evolution of rheumatoid arthritis disease activity. *Arthritis care & research*. 2015;67(6):765–75.

**Reason for exclusion: out of scope**

Reed SD, Vollan TA, Svec MA. Pregnancy outcomes in women with rheumatoid arthritis in Washington State. *Matern Child Health J*. 2006;10(4):361–6.

**Reason for exclusion: sub-population**

Roberts-Thomson PJ, Roberts-Thomson RA, Nikoloutsopoulos T, Gillis D. Immune dysfunction in Australian Aborigines. *Asian Pac J Allergy Immunol*. 2005;23(4):235–44.

**Reason for exclusion: sub-population**

Roux CH, Saraux A, Le Bihan E, Fardellone P, Guggenbuhl P, Fautrel B, et al. Rheumatoid arthritis and spondyloarthropathies: geographical variations in prevalence in France. *The Journal of rheumatology*. 2007;34(1):117–22.

**Reason for exclusion: Duplicate**

Rudan I, Sidhu S, Papana A, Meng SJ, Xin-Wei Y, Wang W, et al. Prevalence of rheumatoid arthritis in low- and middle-income countries: A systematic review and analysis. *J Glob Health*. 2015;5(1):10409.

**Reason for exclusion: systematic review**

Saraux A, Guedes C, Allain J, Devauchelle V, Valls I, Lamour A, et al. Prevalence of rheumatoid arthritis and spondyloarthropathy in Brittany, France. *Societe de Rhumatologie de l'Ouest. The Journal of rheumatology*. 1999;26(12):2622–7.

**Reason for exclusion: Abstract**

Scublinksky D, Venarotti H, Citera G, Messina OD, Scheines E, Rillo O, et al. The prevalence of rheumatoid arthritis in Argentina: a capture-recapture study in a city of Buenos Aires province. *J Clin Rheumatol*. 2010;16(7):317–21.

**Reason for exclusion: study design**

Shapira Y, Agmon-Levin N, Shoenfeld Y. Geoepidemiology of autoimmune rheumatic diseases. *Nat Rev Rheumatol*. 2010;6(8):468–76.

**Reason for exclusion: review**

Simard JF, Mittleman MA. Prevalent rheumatoid arthritis and diabetes among NHANES III participants aged 60 and older. *The Journal of rheumatology*. 2007;34(3):469–73.

**Reason for exclusion: sub-population**

Souto A, Maneiro JR, Gomez-Reino JJ. Rate of discontinuation and drug survival of biologic therapies in rheumatoid arthritis: a systematic review and meta-analysis of drug registries and health care databases. *Rheumatology (Oxford)*. 2016;55(3):523–34.

**Reason for exclusion: out of scope**

Spector TD, Hart DJ, Powell RJ. Prevalence of rheumatoid arthritis and rheumatoid factor in women: evidence for a secular decline. *Ann Rheum Dis*. 1993;52(4):254–7.

**Reason for exclusion: sub-population**

Stojanovic R. The Low Prevalence of Rheumatoid Arthritis in Two Regions of Serbia Based on Evidence-Based Data. *Turkish Journal of Rheumatology*. 2013;27(4):248–52.

**Reason for exclusion: Study design**

Stundner O, Chiu YL, Sun X, Goodman SM, Russell LA, Calloway JJ, et al. Perioperative outcomes in patients with rheumatoid versus osteoarthritis for total hip arthroplasty: a population-based study. *Clinical and experimental rheumatology*. 2013;31(6):889–95.

**Reason for exclusion: sub-population**

Tan TC, Gao X, Thong BY, Leong KP, Lian TY, Law WG, et al. Comparison of elderly- and young-onset rheumatoid arthritis in an Asian cohort. *Int J Rheum Dis*. 2017;20(6):737–45.

**Reason for exclusion: sub-population**

Tobon GJ, Youinou P, Saraux A. The environment, geo-epidemiology, and autoimmune disease: Rheumatoid arthritis. *Autoimmunity reviews*. 2010;9(5):A288-92.

**Reason for exclusion: review**

Tzeng YM, Kao LT, Lin HC, Huang CY. A Population-Based Study on the Association between Benign Prostatic Enlargement and Rheumatoid Arthritis. *Public Library of Science one*. 2015;10(7):e0133013.

**Reason for exclusion: out of scope**

Uhlig T, Kvien TK, Glennas A, Smedstad LM, Forre O. The incidence and severity of rheumatoid arthritis, results from a county register in Oslo, Norway. *The Journal of rheumatology*. 1998;25(6):1078–84.

**Reason for exclusion: RA incidence**

Uhlig T, Moe RH, Kvien TK. The burden of disease in rheumatoid arthritis. *Pharmacoeconomics*. 2014;32(9):841–51.

**Reason for exclusion: review**

Usenbo A, Kramer V, Young T, Musekiwa A. Prevalence of Arthritis in Africa: A Systematic Review and Meta-Analysis. *Public Library of Science one*. 2015;10(8):e0133858.

**Reason for exclusion: systematic review**

Verstappen SM, Askling J, Berglind N, Franzen S, Frisell T, Garwood C, et al. Methodological Challenges When Comparing Demographic and Clinical Characteristics of International Observational Registries. *Arthritis care & research*. 2015;67(12):1637–45.

**Reason for exclusion: out of scope**

Videm V, Thomas R, Brown MA, Hoff M. Self-reported Diagnosis of Rheumatoid Arthritis or Ankylosing Spondylitis Has Low Accuracy: Data from the Nord-Trøndelag Health Study. *The Journal of rheumatology*. 2017;44(8):1134–41.

**Reason for exclusion: Using secondary data**

Waldenlind K, Eriksson JK, Grewin B, Askling J. Validation of the rheumatoid arthritis diagnosis in the Swedish National Patient Register: a cohort study from Stockholm County. *BMC musculoskeletal disorders*. 2014;15:432.

**Reason for exclusion: out of scope**

Wang SL, Chang CH, Hu LY, Tsai SJ, Yang AC, You ZH. Risk of developing depressive disorders following rheumatoid arthritis: a nationwide population-based study. *Public Library of Science one*. 2014;9(9):e107791.

**Reason for exclusion: out of scope**

Weiss RJ, Stark A, Wick MC, Ehlin A, Palmblad K, Wretenberg P. Orthopaedic surgery of the lower limbs in 49,802 rheumatoid arthritis patients: results from the Swedish National Inpatient Registry during 1987 to 2001. *Ann Rheum Dis*. 2006;65(3):335–41.

**Reason for exclusion: sub-population**



Widdifield J, Bombardier C, Bernatsky S, Paterson JM, Green D, Young J, et al. An administrative data validation study of the accuracy of algorithms for identifying rheumatoid arthritis: the influence of the reference standard on algorithm performance. *BMC musculoskeletal disorders*. 2014;15:216.

**Reason for exclusion: out of scope**

Widdifield J, Paterson JM, Bernatsky S, Tu K, Tomlinson G, Kuriya B, et al. The epidemiology of rheumatoid arthritis in Ontario, Canada. *Arthritis Rheumatol*. 2014;66(4):786–93.

**Reason for exclusion: duplicate**

Woolf AD, Pfleger B. Burden of major musculoskeletal conditions. *Bull World Health Organ*. 2003;81(9):646–56.

**Reason for exclusion: review**

Xiang YJ, Dai SM. Prevalence of rheumatic diseases and disability in China. *Rheumatol Int*. 2009;29(5):481–90.

**Reason for exclusion: review**

Zeng QY, Chen R, Darmawan J, Xiao ZY, Chen SB, Wigley R, et al. Rheumatic diseases in China. *Arthritis research & therapy*. 2008;10(1):R17.

**Reason for exclusion: review**

Zeng XG, Chen B, Zeng F, Hou CZ, He Q, Huang L, et al. [Study on the prevalence rate of rheumatoid arthritis in Zhuang nationality population from Nanning, Guangxi]. *Zhonghua Liu Xing Bing Xue Za Zhi*. 2007;28(11):1127–9.

**Reason for exclusion: Article in Chinese**

de Pablo P, Dietrich T, McAlindon TE. Association of periodontal disease and tooth loss with rheumatoid arthritis in the US population. *The Journal of rheumatology*. 2008;35(1):70–6.

**Reason for exclusion: Using secondary data**

van Baal PH, Engelfriet PM, Hoogenveen RT, Poos MJ, van den Dungen C, Boshuizen HC. Estimating and comparing incidence and prevalence of chronic diseases by combining GP registry data: the role of uncertainty. *BMC Public Health*. 2011;11:163.

**Reason for exclusion: Study design**

**Supplementary Table 4. A chronological overview of the 60 published population-based studies that were included in the systematic review.**

| Reference                  | Year | Country     | Prevalence percentage (95% CI) | Size of the sample (n) or population (N) | Methodology | Data source | Classification Criteria used | Geographic population setting |
|----------------------------|------|-------------|--------------------------------|------------------------------------------|-------------|-------------|------------------------------|-------------------------------|
| 1. Moolenburgh et al. (1)  | 1986 | Lesotho     | 1.8 (1.09, 2.78)               | n= 1070                                  | PointP      | P.B.SU      | ARA criteria 1956            | Rural                         |
| 2. Aho et al. (2)          | 1989 | Finland     | 1.9 (1.59, 2.24)               | n= 7124                                  | PeriodP     | P.B.SU      | Clinical diagnosis           | Mixed                         |
| 3. Pountain. (3)           | 1991 | Oman        | 0.36 (0.14, 0.74)              | n=1925                                   | PointP      | P.B.SU      | Revised ARA 1987             | Mixed                         |
| 4. Darmawan et al. (4)     | 1993 | Indonesia   | 0.3 (0.06, 0.84)               | n=1071                                   | PointP      | P.B.SU      | ARA criteria 1956            | Urban                         |
|                            |      |             | 0.2 (0.09, 0.37)               | n=4683                                   | PointP      | P.B.SU      | ARA criteria 1956            | Rural                         |
| 5. Malaviya et al. (5)     | 1993 | India       | 0.75 (0.48, 0.10)              | n=3393                                   | PointP      | P.B.SU      | Revised ARA 1987             | Rural                         |
| 6. Silman et al. (6)       | 1993 | Nigeria     | 0.0 (0.00, 0.18)               | n=2000                                   | PointP      | P.B.SU      | Revised ARA 1987             | Rural                         |
| 7. Hakala et al. (7)       | 1993 | Finland     | 0.8 (0.67, 0.94)               | N=18300                                  | PointP      | AdminD      | Revised ARA 1987             | Mixed                         |
| 8. Hameed et al. (8)       | 1995 | Pakistan    | 0.42 (0.24, 0.66)              | n=4232                                   | PointP      | P.B.SU      | Clinical diagnosis           | Urban                         |
| 9. Drosos et al. (9)       | 1997 | Greece      | 0.34 (0.30, 0.37)              | N=128916                                 | PeriodP     | AdminD      | Revised ARA 1987             | Urban                         |
| 10. Dans et al. (10)       | 1997 | Philippines | 0.17 (0.05, 0.39)              | n=3006                                   | PeriodP     | P.B.SU      | Revised ARA 1987             | Urban                         |
| 11. Kvien et al. (11)      | 1997 | Norway      | 0.38 (0.12, 0.87)              | n=1333                                   | PeriodP     | RegistryD   | Clinical diagnosis           | Urban                         |
|                            |      |             | 0.6 (0.41, 0.82)               | n=5886                                   | PointP      | P.B.SU      | Clinical diagnosis           | Urban                         |
| 12. Stojanovic et al. (12) | 1998 | Yugoslavia  | 0.18 (0.04, 0.46)              | n=2184                                   | PeriodP     | P.B.SU      | Revised ARA 1987             | Urban                         |
| 13. Chaiamnuay et al. (13) | 1998 | Thailand    | 0.12 (0.02, 0.35)              | n=2463                                   | PointP      | P.B.SU      | Revised ARA 1987             | Rural                         |
| 14. Cimmino et al. (14)    | 1998 | Italy       | 0.33 (0.16, 0.59)              | n=3294                                   | PeriodP     | P.B.SU      | Modified ARA 1987            | Rural                         |

|                            |      |              |                   |           |         |        |                    |       |
|----------------------------|------|--------------|-------------------|-----------|---------|--------|--------------------|-------|
| 15. Al-Dalaan et al. (15)  | 1998 | Saudi Arabia | 0.22 (0.11, 0.37) | n=5891    | PointP  | P.B.SU | Revised ARA 1987   | Mixed |
| 16. Simonsson et al. (16)  | 1999 | Sweden       | 0.51 (0.31, 0.78) | n=3928    | PointP  | P.B.SU | Modified ARA 1987  | Urban |
| 17. Gabriel et al. (17)    | 1999 | USA          | 1.07 (0.65, 1.64) | n=1878    | PeriodP | AdminD | Revised ARA 1987   | Urban |
| 18. Shichikawa et al. (18) | 1999 | Japan        | 0.29 (0.13, 0.55) | n=3000    | PeriodP | P.B.SU | Rome ARA 1961      | Rural |
| 19. Power et al. (19)      | 1999 | Ireland      | 0.5 (0.18, 1.07)  | n=1227    | PointP  | P.B.SU | Revised ARA 1987   | Mixed |
| 20. Llerena et al. (20)    | 2000 | Cuba         | 2.7 (1.18, 5.23)  | n=300     | PointP  | P.B.SU | Revised ARA 1987   | Urban |
| 21. Riise et al. (21)      | 2000 | Norway       | 0.43 (0.39, 0.47) | N=107787  | PeriodP | AdminD | Revised ARA 1987   | Mixed |
| 22. Spindler et al. (22)   | 2002 | Argentina    | 0.2 (0.18, 0.21)  | N=352089  | PeriodP | AdminD | Revised ARA 1987   | Urban |
| 23. Carmona et al. (23)    | 2002 | Spain        | 0.5 (0.28, 0.82)  | n=2998    | PointP  | P.B.SU | Modified ARA 1987  | Mixed |
| 24. Symmons et al. (24)    | 2002 | UK           | 0.81 (0.61, 1.04) | n=7050    | PointP  | P.B.SU | Revised ARA 1987   | Mixed |
| 25. Hoa et al. (25)        | 2003 | Vietnam      | 0.28 (0.10, 0.61) | n=2119    | PointP  | P.B.SU | Revised ARA 1987   | Urban |
| 26. Dai et al. (26)        | 2003 | China        | 0.47 (0.31, 0.66) | n=6584    | PeriodP | P.B.SU | Revised ARA 1987   | Urban |
| 27. Senna et al. (27)      | 2004 | Brazil       | 0.46 (0.25, 0.77) | n=3038    | PointP  | P.B.SU | Revised ARA 1987   | Urban |
| 28. Akar et al. (28)       | 2004 | Turkey       | 0.49 (0.26, 0.82) | n=2835    | PeriodP | P.B.SU | Modified ARA 1987  | Urban |
| 29. Kacar et al. (29)      | 2005 | Turkey       | 0.38 (0.19, 0.66) | n=3173    | PeriodP | P.B.SU | Revised ARA 1987   | Urban |
| 30. Haq et al. (30)        | 2005 | Bangladesh   | 0.4 (0.13, 0.92)  | n=1279    | PointP  | P.B.SU | Revised ARA 1987   | Urban |
|                            |      |              | 0.2 (0.03, 0.64)  | n=1230    | PointP  | P.B.SU | Revised ARA 1987   | Urban |
|                            |      |              | 0.7 (0.41, 1.10)  | n=2568    | PointP  | P.B.SU | Revised ARA 1987   | Rural |
| 31. Edwards et al. (31)    | 2005 | UK           | 0.5 (0.49, 0.50)  | N=3500000 | PeriodP | AdminD | Clinical diagnosis | Mixed |
| 32. Salaffi et al. (32)    | 2005 | Italy        | 0.46 (0.22, 0.84) | n=2155    | PointP  | P.B.SU | Revised ARA 1987   | Mixed |

|                                 |      |                |                   |            |         |           |                    |       |
|---------------------------------|------|----------------|-------------------|------------|---------|-----------|--------------------|-------|
| 33. Guillemin et al. (33)       | 2005 | France         | 0.34 (0.23, 0.48) | n=9395     | PointP  | P.B.SU    | Clinical diagnosis | Mixed |
| 34. Kiss et al. (34)            | 2005 | Hungary        | 0.37 (0.26, 0.51) | n=10000    | PointP  | P.B.SU    | Revised ARA 1987   | Mixed |
| 35. Lacaille et al. (35)        | 2005 | Canada         | 0.76 (0.75, 0.76) | N=3646053  | PeriodP | AdminD    | Clinical diagnosis | Mixed |
| 36. Hanova et al. (36)          | 2006 | Czech Republic | 0.61 (0.57, 0.64) | N=186077   | PeriodP | RegistryD | Revised ARA 1987   | Mixed |
| 37. Andrianakos et al. (37)     | 2006 | Greece         | 0.68 (0.51, 0.87) | n=8740     | PeriodP | P.B.SU    | Revised ARA 1987   | Mixed |
| 38. Adomaviciute et al. (38)    | 2008 | Lithuania      | 0.92 (0.70, 1.18) | n=6524     | PointP  | P.B.SU    | Revised ARA 1987   | Urban |
| 39. Davatchi et al. (39)        | 2009 | Iran           | 0.19 (0.03, 0.55) | n=1565     | PointP  | P.B.SU    | Clinical diagnosis | Rural |
| 40. Anagnostopoulos et al. (40) | 2010 | Greece         | 0.57 (0.34, 0.87) | n=3528     | PeriodP | P.B.SU    | Revised ARA 1987   | Mixed |
| 41. Della Rossa et al. (41)     | 2010 | Italy          | 0.51 (0.42, 0.60) | n=26709    | PeriodP | RegistryD | Modified ARA 1987  | Mixed |
| 42. Neovius et al. (42)         | 2011 | Sweden         | 0.7 (0.65, 0.74)  | N=123363   | PeriodP | LinkedD   | Clinical diagnosis | Mixed |
| 43. Pedersen et al. (43)        | 2011 | Denmark        | 0.26 (0.13, 0.44) | n=4995     | PointP  | P.B.SU    | Modified ARA 1987  | Mixed |
| 44. Rodriguez-Amado et al. (44) | 2011 | Mexico         | 0.4 (0.24, 0.62)  | n=4713     | PeriodP | P.B.SU    | Revised ARA 1987   | Mixed |
| 45. Malemba et al. (45)         | 2012 | Congo          | 0.6 (0.40, 0.85)  | n=5000     | PointP  | P.B.SU    | Revised ARA 1987   | Urban |
| 46. Cakir et al. (46)           | 2012 | Turkey         | 0.32 (0.24, 0.41) | n=17835    | PointP  | P.B.SU    | Modified ARA 1987  | Rural |
| 47. Chaaya et al. (47)          | 2012 | Lebanon        | 1 (0.69, 1.38)    | n=3530     | PeriodP | P.B.SU    | Revised ARA 1987   | Mixed |
| 48. Widdifield et al. (48)      | 2013 | Canada         | 0.9 (0.89, 0.90)  | N=10851140 | PeriodP | LinkedD   | Clinical diagnosis | Urban |
| 49. Chung et al. (49)           | 2013 | Taiwan         | 0.12 (0.12, 0.12) | N=23740000 | PeriodP | AdminD    | Revised ARA 1987   | Mixed |
| 50. Kuo et al. (50)             | 2013 | Taiwan         | 0.1 (0.09, 0.09)  | N=16476882 | PeriodP | AdminD    | Revised ARA 1987   | Mixed |
| 51. Otsa et al. (51)            | 2013 | Estonia        | 0.46 (0.44, 0.47) | N=1340127  | PeriodP | AdminD    | Revised ARA 1987   | Mixed |

|                                 |      |             |                   |            |         |            |                    |       |
|---------------------------------|------|-------------|-------------------|------------|---------|------------|--------------------|-------|
| 52. Sung et al. (52)            | 2013 | South Korea | 0.27 (0.26, 0.27) | N=49404660 | PeriodP | AdminD     | Clinical diagnosis | Mixed |
| 53. Yu et al. (53)              | 2013 | Taiwan      | 0.05 (0.04, 0.05) | N=23753407 | PeriodP | AdminD     | Revised ARA 1987   | Mixed |
| 54. Rossini et al. (54)         | 2014 | Italy       | 0.41 (0.40, 0.41) | N=4715283  | PointP  | LinkedD    | Clinical diagnosis | Mixed |
| 55. Moghimi et al. (55)         | 2015 | Iran        | 0.51 (0.34, 0.72) | n=5830     | PeriodP | P.B.SU     | Clinical diagnosis | Urban |
| 56. Guevara-Pacheco et al. (56) | 2016 | Mexico      | 0.9 (0.61, 1.27)  | n=3400     | PointP  | P.B.SU     | Revised ARA 1987   | Urban |
|                                 |      |             | 0.8 (0.41, 1.39)  | n=1477     | PointP  | P.B.SU     | Revised ARA 1987   | Rural |
| 57. Jean et al. (57)            | 2017 | Canada      | 0.8 (0.79, 0.80)  | N=7369500  | PeriodP | LinkedD    | Clinical diagnosis | Urban |
| 58. Hunter et al. (58)          | 2017 | USA         | 0.46 (0.45, 0.46) | N=31316902 | PeriodP | AdminD (A) | Clinical diagnosis | Mixed |
|                                 |      |             | 0.5 (0.49, 0.50)  | N=35083356 | PeriodP | AdminD (B) | Clinical diagnosis | Mixed |
| 59. Batko et al. (59)           | 2017 | Poland      | 0.9 (0.59, 1.30)  | n=3000     | PeriodP | P.B.SU     | Clinical diagnosis | Mixed |
| 60. Kumar et al. (60)           | 2018 | India       | 0.47 (0.30, 0.70) | n=5053     | PeriodP | P.B.SU     | Clinical diagnosis | Urban |
|                                 |      |             | 0.15 (0.06, 0.29) | n=5118     | PeriodP | P.B.SU     | Clinical diagnosis | Rural |

PointP= Point-Prevalence, PeriodP= Period-Prevalence, P.B.SU= Population-based survey, AdminD= Administrative Data, RegistryD= Registry Data, LinkedD= Linked Data, AdminD (A): Truven Health MARETScan Research Database, AdminD (B): IMF PharMetric Plus Database, ARA: American Rheumatism Association.

## References:

1. Moolenburgh JD, Valkenburg HA, Fourie PB. A population study on rheumatoid arthritis in lesotho, southern africa. *Ann Rheum Dis* 1986;45:691-5.
2. Aho K, Heliovaara M, Sievers K, Maatela J, Isomaki H. Clinical arthritis associated with positive radiological and serological findings in finnish adults. *Rheumatol Int* 1989;9:7-11.
3. Pountain G. The prevalence of rheumatoid arthritis in the sultanate of oman. *Br J Rheumatol* 1991;30:24-8.
4. Darmawan J, Muirden KD, Valkenburg HA, Wigley RD. The epidemiology of rheumatoid arthritis in indonesia. *Br J Rheumatol* 1993;32:537-40.
5. Malaviya AN, Kapoor SK, Singh RR, Kumar A, Pande I. Prevalence of rheumatoid arthritis in the adult indian population. *Rheumatol Int* 1993;13:131-4.
6. Silman AJ, Ollier W, Holligan S, Birrell F, Adebajo A, Asuzu MC, et al. Absence of rheumatoid arthritis in a rural nigerian population. *J Rheumatol* 1993;20:618-22.
7. Hakala M, Pöllänen R, Nieminen P. The ara 1987 revised criteria select patients with clinical rheumatoid arthritis from a population based cohort of subjects with chronic rheumatic diseases registered for drug reimbursement. *J Rheumatol* 1993;20:1674-8.
8. Hameed K, Gibson T, Kadir M, Sultana S, Fatima Z, Syed A. The prevalence of rheumatoid arthritis in affluent and poor urban communities of pakistan. *Br J Rheumatol* 1995;34:252-6.
9. Drosos AA, Alamanos I, Voulgari PV, Psychos DN, Katsaraki A, Papadopoulos I, et al. Epidemiology of adult rheumatoid arthritis in northwest greece 1987-1995. *J Rheumatol* 1997;24:2129-33.
10. Dans L, Tankeh-Torres S, Amante C, Penserga E. The prevalence of rheumatic diseases in a filipino urban population: A who-ilar copcord study. World health organization. International league of associations for rheumatology. Community oriented programme for the control of the rheumatic diseases. *J Rheumatol* 1997;24:1814-9.
11. Kvien TK, Glennas A, Knudsdod OG, Smedstad LM, Mowinckel P, Forre O. The prevalence and severity of rheumatoid arthritis in oslo. Results from a county register and a population survey. *Scand J Rheumatol* 1997;26:412-8.
12. Stojanović R, Vlajinac H, Palić-Obradović D, Janosević S, Adanja B. Prevalence of rheumatoid arthritis in belgrade, yugoslavia. *Br J Rheumatol* 1998;37:729-32.
13. Chaiamnuay P, Darmawan J, Muirden K, Assawatnabodee P. Epidemiology of rheumatic disease in rural thailand: A who-ilar copcord study. Community oriented programme for the control of rheumatic disease. *J Rheumatol* 1998;25:1382-7.
14. Cimmino MA, Parisi M, Moggiana G, Mela GS, Accardo S. Prevalence of rheumatoid arthritis in italy: The chiavari study. *Ann Rheum Dis* 1998;57:315-8.
15. Al-Dalaan A, Al Ballaa S, Bahabri S, Biyari T, Al Sukait M, Mousa M. The prevalence of rheumatoid arthritis in the qassim region of saudi arabia. *Ann Saudi Med* 1998;18:396-7.
16. Simonsson M, Bergman S, Jacobsson LT, Petersson IF, Svensson B. The prevalence of rheumatoid arthritis in sweden. *Scand J Rheumatol* 1999;28:340-3.
17. Gabriel SE, Crowson CS, O'Fallon M. The epidemiology of rheumatoid arthritis in rochester, minnesota, 1955–1985. *Arthritis & Rheumatism: Official Journal of the American College of Rheumatology* 1999;42:415-20.
18. Shichikawa K, Inoue K, Hirota S, Maeda A, Ota H, Kimura M, et al. Changes in the incidence and prevalence of rheumatoid arthritis in kamitonda, wakayama, japan, 1965–1996. *Ann Rheum Dis* 1999;58:751-6.
19. Power D, Codd M, Ivers L, Sant S, Barry M. Prevalence of rheumatoid arthritis in dublin, ireland: A population based survey. *Ir J Med Sci* 1999;168:197-200.

20. Reyes Llerena GA, Guibert Toledano M, Hernandez Martinez AA, Gonzalez Otero ZA, Alcocer Varela J, Cardiel MH. Prevalence of musculoskeletal complaints and disability in cuba. A community-based study using the copcord core questionnaire. *Clin Exp Rheumatol* 2000;18:739-42.
21. Riise T, Jacobsen BK, Gran JT. Incidence and prevalence of rheumatoid arthritis in the county of troms, northern norway. *J Rheumatol* 2000;27:1386-9.
22. Spindler A, Bellomio V, Berman A, Lucero E, Baigorria M, Paz S, et al. Prevalence of rheumatoid arthritis in tucuman, argentina. *J Rheumatol* 2002;29:1166-70.
23. Carmona L, Villaverde V, Hernandez-Garcia C, Ballina J, Gabriel R, Laffon A. The prevalence of rheumatoid arthritis in the general population of spain. *Rheumatology (Oxford)* 2002;41:88-95.
24. Symmons D, Turner G, Webb R, Asten P, Barrett E, Lunt M, et al. The prevalence of rheumatoid arthritis in the united kingdom: New estimates for a new century. *Rheumatology (Oxford)* 2002;41:793-800.
25. Hoa TTM, Darmawan J, Le Chen S, Van Hung N, Nhi CT, An TN, et al. Prevalence of the rheumatic diseases in urban vietnam: A who-ilar copcord study. *J Rheumatol* 2003;30:2252-6.
26. Dai SM, Han XH, Zhao DB, Shi YQ, Liu Y, Meng JM. Prevalence of rheumatic symptoms, rheumatoid arthritis, ankylosing spondylitis, and gout in shanghai, china: A copcord study. *J Rheumatol* 2003;30:2245-51.
27. Senna ER, De Barros ALP, Silva EO, Costa IF, Pereira LVB, Ciconelli RM, et al. Prevalence of rheumatic diseases in brazil: A study using the copcord approach. *J Rheumatol* 2004;31:594-7.
28. Akar S, Birlik M, Gurler O, Sari I, Onen F, Manisali M, et al. The prevalence of rheumatoid arthritis in an urban population of izmir-turkey. *Clin Exp Rheumatol* 2004;22:416-20.
29. Kacar C, Gilgil E, Tuncer T, Butun B, Urhan S, Arian V, et al. Prevalence of rheumatoid arthritis in antalya, turkey. *Clin Rheumatol* 2005;24:212-4.
30. Haq SA, Darmawan J, Islam MN, Uddin MZ, Das BB, Rahman F, et al. Prevalence of rheumatic diseases and associated outcomes in rural and urban communities in bangladesh: A copcord study. *J Rheumatol* 2005;32:348-53.
31. Edwards CJ, Arden NK, Fisher D, Saperia JC, Reading I, Van Staa TP, et al. The changing use of disease-modifying anti-rheumatic drugs in individuals with rheumatoid arthritis from the united kingdom general practice research database. *Rheumatology (Oxford)* 2005;44:1394-8.
32. Salaffi F, De Angelis R, Grassi W, Prevalence MAP, study ING. Prevalence of musculoskeletal conditions in an italian population sample: Results of a regional community-based study. I. The mapping study. *Clin Exp Rheumatol* 2005;23:819-28.
33. Guillemin F, Saraux A, Guggenbuhl P, Roux CH, Fardellone P, Le Bihan E, et al. Prevalence of rheumatoid arthritis in france: 2001. *Ann Rheum Dis* 2005;64:1427-30.
34. Kiss CG, Lovei C, Suto G, Varju C, Nagy Z, Fuzesi Z, et al. Prevalence of rheumatoid arthritis in the south-transdanubian region of hungary based on a representative survey of 10,000 inhabitants. *J Rheumatol* 2005;32:1688-90.
35. Lacaille D, Anis AH, Guh DP, Esdaile JM. Gaps in care for rheumatoid arthritis: A population study. *Arthritis Rheum* 2005;53:241-8.
36. Hanova P, Pavelka K, Dostal C, Holcatova I, Pikhart H. Epidemiology of rheumatoid arthritis, juvenile idiopathic arthritis and gout in two regions of the czech republic in a descriptive population-based survey in 2002-2003. *Clin Exp Rheumatol* 2006;24:499-507.
37. Andrianakos A, Trontzas P, Christoyannis F, Kaskani E, Nikolia Z, Tavaniotou E, et al. Prevalence and management of rheumatoid arthritis in the general population of greece--the esordig study. *Rheumatology (Oxford)* 2006;45:1549-54.
38. Adomaviciute D, Pileckyte M, Baranauskaite A, Morvan J, Dadonienė J, Guillemin F. Prevalence survey of rheumatoid arthritis and spondyloarthritis in lithuania. *Scand J Rheumatol* 2008;37:113-9.

39. Davatchi F, Banihashemi AT, Gholami J, Faezi ST, Forouzanfar MH, Salesi M, et al. The prevalence of musculoskeletal complaints in a rural area in iran: A who-ilar copcord study (stage 1, rural study) in iran. *Clin Rheumatol* 2009;28:1267-74.
40. Anagnostopoulos I, Zinzaras E, Alexiou I, Papathanasiou AA, Davas E, Koutroumpas A, et al. The prevalence of rheumatic diseases in central greece: A population survey. *BMC Musculoskelet Disord* 2010;11:98.
41. Della Rossa A, Neri R, Talarico R, Doveri M, Consensi A, Salvadori S, et al. Diagnosis and referral of rheumatoid arthritis by primary care physician: Results of a pilot study on the city of Pisa, Italy. *Clin Rheumatol* 2010;29:71-81.
42. Neovius M, Simard JF, Askling J, group As. Nationwide prevalence of rheumatoid arthritis and penetration of disease-modifying drugs in sweden. *Ann Rheum Dis* 2011;70:624-9.
43. Pedersen JK, Svendsen AJ, Hørslev-Petersen K. Prevalence of rheumatoid arthritis in the southern part of denmark. *The open rheumatology journal* 2011;5:91-7.
44. Rodriguez-Amado J, Pelaez-Ballestas I, Sanin LH, Esquivel-Valerio JA, Burgos-Vargas R, Perez-Barbosa L, et al. Epidemiology of rheumatic diseases. A community-based study in urban and rural populations in the state of nuevo leon, mexico. *J Rheumatol Suppl* 2011;86:9-14.
45. Malemba JJ, Mbuyi-Muamba JM, Mukaya J, Bossuyt X, Verschueren P, Westhovens R. The epidemiology of rheumatoid arthritis in kinshasa, democratic republic of congo--a population-based study. *Rheumatology (Oxford)* 2012;51:1644-7.
46. Cakir N, Pamuk ON, Dervis E, Imeryuz N, Uslu H, Benian O, et al. The prevalences of some rheumatic diseases in western turkey: Havsa study. *Rheumatol Int* 2012;32:895-908.
47. Chaaya M, Slim ZN, Habib RR, Arayssi T, Dana R, Hamdan O, et al. High burden of rheumatic diseases in lebanon: A copcord study. *Int J Rheum Dis* 2012;15:136-43.
48. Widdifield J, Paterson JM, Bernatsky S, Tu K, Thorne JC, Ahluwalia V, et al. The rising burden of rheumatoid arthritis surpasses rheumatology supply in ontario. *Can J Public Health* 2013;104:e450-5.
49. Chung WS, Lin CL, Peng CL, Chen YF, Lu CC, Sung FC, et al. Rheumatoid arthritis and risk of acute myocardial infarction--a nationwide retrospective cohort study. *Int J Cardiol* 2013;168:4750-4.
50. Kuo CF, Luo SF, See LC, Chou IJ, Chang HC, Yu KH. Rheumatoid arthritis prevalence, incidence, and mortality rates: A nationwide population study in taiwan. *Rheumatol Int* 2013;33:355-60.
51. Otsa K, Tammaru M, Vorobjov S, Esko M, Parsik E, Lang K. The prevalence of rheumatoid arthritis in estonia: An estimate based on rheumatology patients' database. *Rheumatol Int* 2013;33:955-8.
52. Sung YK, Cho SK, Choi CB, Bae SC. Prevalence and incidence of rheumatoid arthritis in south korea. *Rheumatol Int* 2013;33:1525-32.
53. Yu KH, See LC, Kuo CF, Chou IJ, Chou MJ. Prevalence and incidence in patients with autoimmune rheumatic diseases: A nationwide population-based study in taiwan. *Arthritis Care Res (Hoboken)* 2013;65:244-50.
54. Rossini M, Rossi E, Bernardi D, Viapiana O, Gatti D, Idolazzi L, et al. Prevalence and incidence of rheumatoid arthritis in italy. *Rheumatol Int* 2014;34:659-64.
55. Moghimi N, Davatchi F, Rahimi E, Saidi A, Rashadmanesh N, Moghimi S, et al. Who-ilar copcord study (stage 1, urban study) in sanandaj, iran. *Clin Rheumatol* 2015;34:535-43.
56. Guevara-Pacheco S, Feican-Alvarado A, Sanin LH, Vintimilla-Ugalde J, Vintimilla-Moscoso F, Delgado-Pauta J, et al. Prevalence of musculoskeletal disorders and rheumatic diseases in cuenca, ecuador: A who-ilar copcord study. *Rheumatol Int* 2016;36:1195-204.
57. Jean S, Hudson M, Gamache P, Bessette L, Fortin PR, Boire G, et al. Temporal trends in prevalence, incidence, and mortality for rheumatoid arthritis in quebec, canada: A population-based study. *Clin Rheumatol* 2017;36:2667-71.



58. Hunter TM, Boytsov NN, Zhang X, Schroeder K, Michaud K, Araujo AB. Prevalence of rheumatoid arthritis in the united states adult population in healthcare claims databases, 2004-2014. *Rheumatol Int* 2017;37:1551-7.
59. Batko B, Stajszczyk M, Świerkot J, Urbański K, Raciborski F, Jędrzejewski M, et al. Prevalence and clinical characteristics of rheumatoid arthritis in poland: A nationwide study. *Arch Med Sci* 2017; 15:134-40.
60. Kumar P, Alok R, Das SK, Srivastava R, Agarwal GG. Distribution of rheumatological diseases in rural and urban areas: An adapted copcord stage i phase iii survey of lucknow district in north india. *Int J Rheum Dis* 2018;21:1894-99.

**Supplementary Table 5. Risk of bias assessment.** A detailed of the risk bias assessment results for included published studies are reported in Supplemental Table 7.

| Citations             | Q1 | Q2 | Q3 | Q4 | Q5 | Q6 | Q7 | Q8 | Q9 | Q10 | Summary risk bias assessment |
|-----------------------|----|----|----|----|----|----|----|----|----|-----|------------------------------|
| 1. Moolenburgh et al. | Y  | Y  | Y  | N  | Y  | Y  | N  | Y  | Y  | Y   | Low                          |
| 2. Aho et al.         | Y  | Y  | Y  | Y  | Y  | Y  | Y  | Y  | Y  | N   | Low                          |
| 3. Pountain           | Y  | Y  | Y  | Y  | Y  | Y  | N  | Y  | Y  | Y   | Low                          |
| 4. Darmawan et al.    | Y  | Y  | Y  | Y  | Y  | Y  | N  | Y  | Y  | Y   | Low                          |
| 5. Malaviya           | Y  | Y  | Y  | Y  | Y  | Y  | N  | Y  | Y  | Y   | Low                          |
| 6. Silman et al.      | Y  | N  | N  | Y  | N  | N  | N  | Y  | N  | Y   | Moderate                     |
| 7. Hakala et al.      | Y  | Y  | Y  | Y  | Y  | Y  | N  | Y  | Y  | Y   | Low                          |
| 8. Hameed et al.      | Y  | Y  | Y  | Y  | Y  | Y  | N  | Y  | Y  | Y   | Low                          |
| 9. Drosos et al.      | Y  | Y  | Y  | Y  | Y  | Y  | N  | Y  | Y  | N   | Low                          |
| 10. Dans et al.       | Y  | Y  | Y  | Y  | Y  | Y  | Y  | Y  | Y  | N   | Low                          |
| 11. Kvien et al.      | Y  | Y  | Y  | Y  | Y  | Y  | N  | Y  | Y  | N   | Low                          |
| 12. Stojanovic et al. | Y  | Y  | Y  | Y  | Y  | Y  | N  | Y  | Y  | N   | Low                          |
| 13. Chaiamnuay et al. | Y  | Y  | N  | Y  | N  | Y  | Y  | N  | N  | Y   | Moderate                     |
| 14. Cimmino et al.    | Y  | Y  | Y  | N  | Y  | Y  | N  | Y  | Y  | N   | Low                          |
| 15. Al-Dalaan et al.  | Y  | Y  | Y  | Y  | Y  | Y  | N  | Y  | Y  | Y   | Low                          |
| 16. Simonsson et al.  | Y  | Y  | Y  | N  | Y  | Y  | N  | Y  | Y  | Y   | Low                          |
| 17. Gabriel et al.    | Y  | Y  | Y  | Y  | Y  | Y  | N  | Y  | Y  | N   | Low                          |
| 18. Shichikawa et al. | Y  | Y  | Y  | Y  | Y  | Y  | N  | Y  | Y  | N   | Low                          |
| 19. Power et al.      | Y  | Y  | Y  | N  | Y  | Y  | N  | Y  | Y  | Y   | Low                          |
| 20. Llerena et al.    | Y  | Y  | Y  | Y  | Y  | Y  | Y  | Y  | Y  | Y   | Low                          |
| 21. Riise et al.      | Y  | Y  | Y  | Y  | Y  | Y  | N  | Y  | Y  | N   | Low                          |
| 22. Spindler et al.   | Y  | Y  | Y  | Y  | Y  | Y  | N  | Y  | Y  | N   | Low                          |

|                            |   |   |   |   |   |   |   |   |   |   |          |
|----------------------------|---|---|---|---|---|---|---|---|---|---|----------|
| 23. Carmona et al.         | Y | Y | Y | N | Y | Y | N | Y | Y | Y | Low      |
| 24. Symmons et al.         | Y | Y | Y | Y | Y | Y | N | Y | Y | Y | Low      |
| 25. Hoa et al.             | Y | Y | Y | Y | Y | Y | Y | Y | Y | Y | Low      |
| 26. Dai et al.             | Y | Y | Y | Y | Y | Y | Y | Y | Y | N | Low      |
| 27. Senna et al.           | Y | Y | Y | Y | Y | Y | N | Y | Y | Y | Low      |
| 28. Akar et al.            | Y | Y | Y | Y | Y | Y | N | Y | Y | N | Low      |
| 29. Kacar et al.           | Y | Y | Y | Y | Y | Y | N | Y | Y | N | Low      |
| 30. Haq et al.             | Y | Y | Y | Y | Y | Y | Y | Y | Y | Y | Low      |
| 31. Edwards et al.         | Y | Y | Y | Y | Y | Y | N | Y | Y | N | Low      |
| 32. Salaffi et al.         | Y | Y | Y | N | Y | Y | N | Y | Y | Y | Low      |
| 33. Guillemin et al.       | Y | Y | Y | N | Y | Y | N | Y | Y | Y | Low      |
| 34. Kiss et al.            | Y | Y | Y | Y | Y | Y | N | Y | Y | Y | Low      |
| 35. Lacaille et al.        | Y | Y | Y | Y | Y | Y | N | Y | Y | N | Low      |
| 36. Hanova et al.          | Y | Y | Y | Y | Y | Y | N | Y | Y | N | Low      |
| 37. Andrianakos et al.     | Y | Y | Y | Y | Y | Y | N | Y | Y | N | Low      |
| 38. Guevara-Pacheco et al. | Y | Y | Y | Y | Y | Y | Y | Y | Y | Y | Low      |
| 39. Adomaviciute et al.    | Y | Y | Y | N | Y | Y | N | Y | Y | U | Low      |
| 40. Davatchi et al.        | Y | Y | Y | Y | Y | Y | Y | Y | Y | Y | Low      |
| 41. Anagnostopoulos et al. | Y | Y | Y | N | Y | Y | N | Y | Y | N | Low      |
| 42. Della Rossa et al.     | Y | Y | Y | Y | Y | Y | N | Y | Y | N | Low      |
| 43. Neovius et al.         | Y | Y | Y | Y | Y | Y | N | Y | Y | N | Low      |
| 44. Pedersen et al.        | Y | Y | Y | N | Y | Y | N | Y | Y | Y | Low      |
| 45. Rodriguez-Amado et al. | Y | Y | Y | Y | Y | Y | Y | Y | Y | N | Low      |
| 46. Malemba et al          | Y | Y | Y | N | Y | Y | N | Y | Y | Y | Low      |
| 47. Cakir et al.           | Y | Y | Y | Y | Y | Y | N | Y | Y | Y | Low      |
| 48. Chaaya et al.          | Y | Y | Y | Y | Y | Y | Y | Y | Y | N | Low      |
| 49. Widdifield et al.      | Y | Y | Y | Y | Y | Y | N | Y | Y | N | Low      |
| 50. Chung et al.           | Y | Y | Y | Y | N | Y | N | Y | N | N | Moderate |

|                    |   |   |   |   |   |   |   |   |   |   |          |
|--------------------|---|---|---|---|---|---|---|---|---|---|----------|
| 51. Kuo et al.     | Y | Y | Y | Y | N | Y | N | Y | N | N | Moderate |
| 52. Otsa et al.    | Y | Y | Y | Y | Y | Y | N | Y | Y | N | Low      |
| 53. Sung et al.    | Y | Y | Y | Y | N | Y | N | Y | N | N | Moderate |
| 54. Yu et al.      | Y | Y | Y | Y | N | Y | N | Y | N | N | Moderate |
| 55. Rossini et al. | Y | Y | Y | Y | Y | Y | N | Y | Y | Y | Low      |
| 56. Moghimi et al. | Y | Y | Y | N | Y | Y | Y | Y | Y | N | Low      |
| 57. Jean et al.    | Y | Y | Y | N | Y | Y | N | Y | Y | N | Low      |
| 58. Hunter et al.  | Y | Y | Y | N | Y | Y | N | Y | N | N | Moderate |
| 59. Batko et al.   | Y | Y | Y | Y | Y | Y | N | Y | Y | N | Low      |
| 60. Kumar et al.   | Y | Y | Y | N | Y | Y | Y | Y | Y | N | Low      |

Q= Question, Y= Yes (0 point), N=No (1 point), Low risk=0 to 3 points, Moderate risk= 4 to 6 points, High risk= 7 to 10 points.

The risk bias assessment of the included published studies was low in 53 studies (88.3%), moderate in seven studies (11.7%), and there was no high-risk of bias across studies. In five out of seven studies with a moderate risk of bias, the numerators and dominators data used to calculate prevalence proportion were estimated close to zero based on administrative data, raising questions about the validity of data coding in the absence of validity testing. However, absence and low RA prevalence were reported in two P.B.SU studies published in Nigeria and Thailand may conceive the low RA prevalence in a different part of the world. Therefore, all these seven studies with a moderate risk of bias were included in our review as they may represent the real clinical picture and the nature of the RA disease.

**Supplementary Table 6.** The population sampling methodology and the number of participants for examined cohort studies.

| Number of participants      | Number of sub-studies based on the sampling population studies | Number of sub-studies based on population database studies |
|-----------------------------|----------------------------------------------------------------|------------------------------------------------------------|
| 300 <= 4,999                | 34                                                             | 0                                                          |
| 5,000- 9,999                | 12                                                             | 0                                                          |
| 10,000 – 99,999             | 3                                                              | 1                                                          |
| 100,000- 999,999            | 0                                                              | 5                                                          |
| =>1000,000                  | 0                                                              | 12                                                         |
| Total:<br>67 cohort studies | 49                                                             | 18                                                         |

**Supplementary Table 7.** Overall mean of the point and period prevalence rate of RA based on the population sampling methodology in the study.

| The population sampling methodology | Prevalence method used | N         | Mean of RA prevalence rates | Minimum     | Maximum    | Std. Deviation |
|-------------------------------------|------------------------|-----------|-----------------------------|-------------|------------|----------------|
| The sampling population studies     |                        |           |                             |             |            |                |
|                                     | Point prevalence       | 30        | 0.56                        | 0           | 2.7        | 0.52           |
|                                     | Period prevalence      | 19        | 0.57                        | 0.15        | 1.9        | 0.41           |
| <b>Total</b>                        |                        | <b>49</b> | 0.56                        | 0           | 2.7        | 0.48           |
|                                     |                        |           |                             |             |            |                |
| The population database studies     |                        |           |                             |             |            |                |
|                                     | Point prevalence       | 2         | 0.6                         | 0.41        | 0.8        | 0.27           |
|                                     | Period prevalence      | 16        | 0.44                        | 0.05        | 0.9        | 0.26           |
| <b>Total</b>                        |                        | <b>18</b> | <b>0.46</b>                 | <b>0.05</b> | <b>0.9</b> | <b>0.25</b>    |
| <b>Total cohort studies</b>         |                        | <b>67</b> |                             |             |            |                |

**Supplementary Table 8. Overall mean of the point prevalence rate of RA in the study.**

| Continent | Country      | N         | Mean of the point prevalence rate (%) | SD          |
|-----------|--------------|-----------|---------------------------------------|-------------|
| Europe    | Italy        | 2         | 0.43                                  | 0.03        |
|           | Lithuania    | 1         | 0.92                                  | .           |
|           | UK           | 1         | 0.81                                  | .           |
|           | Finland      | 1         | 0.8                                   | .           |
|           | Norway       | 1         | 0.59                                  | .           |
|           | Sweden       | 1         | 0.51                                  | .           |
|           | Ireland      | 1         | 0.5                                   | .           |
|           | Spain        | 1         | 0.5                                   | .           |
|           | Hungary      | 1         | 0.37                                  | .           |
|           | France       | 1         | 0.34                                  | .           |
|           | Denmark      | 1         | 0.26                                  | .           |
|           | <b>Total</b> | <b>12</b> | <b>0.53</b>                           | <b>0.20</b> |
| Asia      | Bangladesh   | 3         | 0.43                                  | 0.25        |
|           | Indonesia    | 2         | 0.25                                  | 0.07        |
|           | India        | 1         | 0.75                                  | .           |
|           | Pakistan     | 1         | 0.42                                  | .           |
|           | Oman         | 1         | 0.36                                  | .           |
|           | Turkey       | 1         | 0.32                                  | .           |
|           | Vietnam      | 1         | 0.28                                  | .           |
|           | Saudi Arabia | 1         | 0.22                                  | .           |
|           | Iran         | 1         | 0.19                                  | .           |
|           | Thailand     | 1         | 0.12                                  | .           |
|           | <b>Total</b> | <b>13</b> | <b>0.34</b>                           | <b>0.19</b> |
| Africa    | Lesotho      | 1         | 1.8                                   | .           |
|           | Congo        | 1         | 0.6                                   | .           |

| Continent     | Country      | N         | Mean of the point prevalence rate (%) | SD          |
|---------------|--------------|-----------|---------------------------------------|-------------|
|               | Nigeria      | 1         | 0                                     | .           |
|               | <b>Total</b> | <b>3</b>  | <b>0.80</b>                           | <b>0.91</b> |
| North America | Mexico       | 2         | 0.85                                  | 0.07        |
|               | Cuba         | 1         | 2.70                                  | .           |
|               | <b>Total</b> | <b>3</b>  | <b>1.46</b>                           | <b>1.06</b> |
| South America | Brazil       | 1         | 0.46                                  | .           |
|               | <b>Total</b> | <b>1</b>  | <b>0.46</b>                           | <b>.</b>    |
| Oceania       | Australia    | 0         | -                                     | -           |
| <b>Total</b>  |              | <b>32</b> | <b>0.56</b>                           | <b>0.51</b> |



**Supplementary Table 9. Overall mean of the period prevalence rates of RA in the study.**

| Continent     | Country        | N         | Mean of the period prevalence rate (%) | SD          |
|---------------|----------------|-----------|----------------------------------------|-------------|
| Europe        | Greece         | 3         | 0.53                                   | 0.17        |
|               | Italy          | 2         | 0.42                                   | 0.12        |
|               | Norway         | 2         | 0.40                                   | 0.03        |
|               | Finland        | 1         | 1.9                                    | .           |
|               | Poland         | 1         | 0.9                                    | .           |
|               | Sweden         | 1         | 0.7                                    | .           |
|               | Czech Republic | 1         | 0.61                                   | .           |
|               | UK             | 1         | 0.5                                    | .           |
|               | Estonia        | 1         | 0.46                                   | .           |
|               | Yugoslavia     | 1         | 0.18                                   | .           |
|               | <b>Total</b>   | <b>14</b> | <b>0.60</b>                            | <b>0.41</b> |
| Asia          | Taiwan         | 3         | 0.09                                   | 0.03        |
|               | Turkey         | 2         | 0.43                                   | 0.07        |
|               | India          | 2         | 0.31                                   | 0.22        |
|               | Lebanon        | 1         | 1                                      | .           |
|               | Iran           | 1         | 0.51                                   | .           |
|               | China          | 1         | 0.47                                   | .           |
|               | Japan          | 1         | 0.29                                   | .           |
|               | South Korea    | 1         | 0.27                                   | .           |
|               | Philippines    | 1         | 0.17                                   | .           |
|               | <b>Total</b>   | <b>13</b> | <b>0.34</b>                            | <b>0.25</b> |
| North America | Canada         | 3         | 0.82                                   | 0.07        |
|               | USA            | 3         | 0.67                                   | 0.34        |
|               | Mexico         | 1         | 0.40                                   | .           |
|               | <b>Total</b>   | <b>7</b>  | <b>0.69</b>                            | <b>0.25</b> |

| Continent     | Country      | N         | Mean of the period prevalence rate (%) | SD          |
|---------------|--------------|-----------|----------------------------------------|-------------|
| South America | Argentina    | 1         | 0.19                                   | .           |
|               | <b>Total</b> | <b>1</b>  | <b>0.19</b>                            | .           |
| Africa        | -            | 0         | .                                      | .           |
| Oceania       | Australia    | 0         | .                                      | .           |
| <b>Total</b>  |              | <b>35</b> | <b>0.51</b>                            | <b>0.35</b> |

**Supplementary Table 10. Overall mean of the continental point prevalence rates of RA using a different type of data sources.**

| Continent                      | Source                  | N         | Mean of point prevalence rates (%) | Minimum (%) | Maximum (%) | SD          |
|--------------------------------|-------------------------|-----------|------------------------------------|-------------|-------------|-------------|
| <b>North America</b>           | Population based survey | 3         | 1.46                               | 0.8         | 2.7         | 1.06        |
|                                | <b>Total</b>            | <b>3</b>  | <b>1.46</b>                        | <b>0.8</b>  | <b>2.7</b>  | <b>1.06</b> |
| <b>Europe</b>                  | Admin Data              | 1         | 0.8                                | 0.8         | 0.8         | .           |
|                                | Population based survey | 10        | 0.52                               | 0.26        | 0.92        | 0.2         |
|                                | Linked Data             | 1         | 0.41                               | 0.41        | 0.41        | .           |
|                                | <b>Total</b>            | <b>12</b> | <b>0.53</b>                        | <b>0.26</b> | <b>0.92</b> | <b>0.2</b>  |
| <b>Africa</b>                  | Population based survey | 3         | 0.8                                | 0           | 1.8         | 0.91        |
|                                | <b>Total</b>            | <b>3</b>  | <b>0.8</b>                         | <b>0</b>    | <b>1.8</b>  | <b>0.91</b> |
| <b>South America</b>           | Population based survey | 1         | 0.46                               | 0.46        | 0.46        | .           |
|                                | <b>Total</b>            | <b>1</b>  | <b>0.46</b>                        | <b>0.46</b> | <b>0.46</b> | <b>.</b>    |
| <b>Asia</b>                    | Population based survey | 13        | 0.34                               | 0.12        | 0.75        | 0.19        |
|                                | <b>Total</b>            | <b>13</b> | <b>0.34</b>                        | <b>0.12</b> | <b>0.75</b> | <b>0.19</b> |
| <b>Oceania</b>                 | -                       | -         | -                                  | -           | -           | -           |
| <b>Total of cohort studies</b> |                         | <b>32</b> | <b>0.56</b>                        | <b>0</b>    | <b>2.7</b>  | <b>0.51</b> |

**Supplementary Table 11. Overall mean of the continental period prevalence rates of RA using a different type of data sources.**

| Continent                      | Source                  | N         | Mean of period prevalence rates (%) | Minimum (%) | Maximum (%) | SD          |
|--------------------------------|-------------------------|-----------|-------------------------------------|-------------|-------------|-------------|
| <b>North America</b>           | Linked Data             | 2         | 0.85                                | 0.8         | 0.9         | 0.07        |
|                                | Admin Data              | 4         | 0.69                                | 0.46        | 1.07        | 0.28        |
|                                | Population based survey | 1         | 0.4                                 | 0.4         | 0.4         | .           |
|                                | <b>Total</b>            | <b>7</b>  | <b>0.69</b>                         | <b>0.4</b>  | <b>1.07</b> | <b>0.25</b> |
| <b>Europe</b>                  | Population based survey | 6         | 0.76                                | 0.18        | 1.9         | 0.61        |
|                                | Linked Data             | 1         | 0.70                                | 0.70        | 0.70        | .           |
|                                | Registry                | 3         | 0.49                                | 0.38        | 0.61        | 0.12        |
|                                | Admin Data              | 4         | 0.43                                | 0.34        | 0.5         | 0.07        |
|                                | <b>Total</b>            | <b>14</b> | <b>0.69</b>                         | <b>0.18</b> | <b>1.9</b>  | <b>0.41</b> |
| <b>Asia</b>                    | Population based survey | 9         | 0.43                                | 0.15        | 1           | 0.25        |
|                                | Admin Data              | 4         | 0.13                                | 0.05        | 0.27        | 0.09        |
|                                | <b>Total</b>            | <b>13</b> | <b>0.34</b>                         | <b>0.05</b> | <b>1</b>    | <b>0.26</b> |
| <b>South America</b>           | Admin Data              | 1         | 0.19                                | 0.2         | 0.2         | .           |
|                                | <b>Total</b>            | <b>1</b>  | <b>0.19</b>                         | <b>0.2</b>  | <b>0.2</b>  | .           |
| <b>Africa</b>                  | -                       | -         | -                                   | -           | -           | -           |
| <b>Oceania</b>                 | -                       | -         | -                                   | -           | -           | -           |
| <b>Total of cohort studies</b> |                         | <b>35</b> | <b>0.51</b>                         | <b>0.05</b> | <b>1.90</b> | <b>0.35</b> |
